## REVIEW

# Smartphone applications supporting self-management programme for adults with Chronic Obstructive Pulmonary Disease: A Scoping Review

Lisa Glynn<sup>1\*</sup>, Margaret Mc Cann<sup>2</sup>, Catherine Mc Cabe<sup>2</sup>

**1** School of Nursing and Midwifery, University of Galway, Ireland, **2** School of Nursing and Midwifery, Trinity College, Dublin 2, Ireland

\* [lisa.l.glynn@universityofgalway.ie](mailto:lisa.l.glynn@universityofgalway.ie)

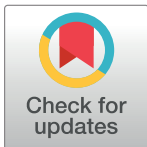

## OPEN ACCESS

**Citation:** Glynn L, Mc Cann M, Mc Cabe C (2024) Smartphone applications supporting self-management programme for adults with Chronic Obstructive Pulmonary Disease: A Scoping Review. PLOS Digit Health 3(6): e0000532. <https://doi.org/10.1371/journal.pdig.0000532>

**Editor:** Hamish S. Fraser, Brown University, UNITED STATES

**Published:** June 13, 2024

**Copyright:** © 2024 Glynn et al. This is an open access article distributed under the terms of the [Creative Commons Attribution License](https://creativecommons.org/licenses/by/4.0/), which permits unrestricted use, distribution, and reproduction in any medium, provided the original author and source are credited.

**Data Availability Statement:** As this is a scoping review, ethical approval was not required. This scoping review provides an overview of the current literature and has summarized the findings on the use of a smartphone application supporting a self-management programme for Chronic Obstruction Pulmonary Disease patients. Also, this review has adhered to a standard, rigorous methodological and reporting framework such as the JBI (2020) PRISMA-ScR. Citation and linking of research data and their associated articles are included in the reference list.

**Funding:** The authors received no specific funding for this work.

## Abstract

**Introduction:** Chronic Obstructive Pulmonary Disease (COPD) significantly impacts on both the quality and quantity of life for patients due to frequent exacerbations requiring hospital admissions resulting in increased morbidity and mortality. A self-management programme purpose is to increase one's knowledge, confidence, and skills to self-manage their chronic illness such as COPD. **Objective:** The objective of this review will therefore answer the following research question: *What is the current literature pertaining to the use of a smartphone app in supporting a comprehensive self-management programme among COPD patients?* A preliminary search was conducted in, Medline, Embase and CINAHL databases to ascertain index terms and keywords. Following this a rigorous search was carried out on Medline, Embase, CINAHL, Web of Science and ASSIA. The findings from this search are presented in tabular form using the PRSIMA flow diagram. **Results:** In this review, fifteen studies met the inclusion criteria. Across all studies participants engaged with the app and developed self-management skills and knowledge to manage their chronic illness. However, engagement with the app without third party involvement declined over time. Technical issues did not cause harm to participants but in some cases contributed to reduced engagement. Smartphone self-management apps empowered a cohort of COPD participants to engage in managing their chronic illness which proved useful in detecting exacerbations earlier resulting in reducing the need for hospitalisations over a three-to-six-month period. By reducing hospitalisations incurred a cost savings for health care and an improved quality and quantity of life for these participants. **Conclusion:** It is evident from the literature that smartphone self-management apps may positively influence participants self-management decisions in terms of knowledge, increase physical activity, self-efficacy that may result in reduced hospitalisation and improved quality of life. It is clear that technical issues and sustained engagement over longer periods of time remains a challenge.

**Competing interests:** The authors have declared that no competing interests exist.

## Author summary

This scoping review provides an overview on the current literature relating to smartphone apps in supporting a comprehensive self-management programme for adults with COPD. Continued engagement with smartphone apps over longer periods of time remain a challenge and this requires further attention to ensure continued engagement. There was some benefit shown in using smartphone apps to support a comprehensive self-management programme however, further research is required with larger sample sizes over a 12-month period in order to determine the effect of smartphone apps supporting a comprehensive self-management programme for adults with COPD.

## Introduction

Chronic Obstructive Pulmonary Disease (COPD), is an incurable chronic lung disease largely caused from extensive exposure to cigarette smoking and other noxious gases. The development of COPD is further influenced by host factors such as genetics, childhood abnormal lung development, air pollution and aging [1]. It results in persistent respiratory symptoms, such as a chronic productive cough, breathlessness, wheeze, and airflow limitation [1]. After ischaemic heart disease and stroke, COPD is the third leading cause of all deaths worldwide (6%) [2].

COPD exacerbations are defined as an acute event described by a worsening of the patient's respiratory symptoms that is beyond normal day-to-day variations [1]. Regular exacerbations with ongoing, progressive lung function decline because of COPD can significantly impact the quality and quantity of life resulting in increased morbidity and mortality [1,3,4,5].

COPD exacerbations are the most frequent presentations to the General Practitioner (GP) and hospital setting among this cohort worldwide resulting in increased morbidity and mortality among this cohort [1,3]. To better manage these exacerbations, there is a need to encourage these patients to engage in a self-management programme to self-manage their disease resulting in earlier recognition of signs and symptoms of an exacerbation, prompting earlier treatment thereby reducing hospitalisations among this cohort [1,6,7].

A self-management programme purpose is to increase one's knowledge, confidence, and skills to self-manage their chronic illness [1,8]. By engaging in a self-management programme results in lifestyle and behavioural changes to improve social, emotional, and physical aspects of their life resulting in managing their chronic illness. This results in improved outcomes for patients, including enhancing quality of life, empowerment to self-manage their chronic illness resulting in reduced healthcare hospitalisation, morbidities, and premature death [1,8,9,10,11,12,13,14].

Since the COVID-19 pandemic there has been a rapid evolution on the use of smartphones, in the delivery of healthcare [15,16]. The COVID-19 pandemic has positively influenced the older population view on technology resulting in the increased use of smartphone apps among this cohort prior to the pandemic [16]. The smartphone has many benefits such as providing convenience communication with the patient and healthcare professional, offers portability, Bluetooth and internet connection allowing for the use of various smartphone apps to work anywhere at any time. Also, smartphones support behaviour changes by providing education, interactive feedback, motivational messages, and access to online resources available at any time and are generally available at a low cost in comparison to other digital technologies such as a computer or tablet. Previous studies utilising self-management programmes via a smartphone app have illustrated some positive clinical health outcomes that prevented deteriorating health conditions necessitating a hospital admission across several chronic illnesses such as diabetes, cardiac, asthma and COPD [6,7,17,18,19]. However, smartphone technology

investigated in past studies among COPD patients mainly focused on one of the following, physical activity, pulmonary rehabilitation, education, recording of symptoms or using medical devices to record physiological parameters [20,21,22]. A self-management programme requires a comprehensive view to capture the entire purpose of a self-management programme resulting in increasing one's knowledge, confidence, and skills to self-manage their chronic illness [1,8]. A comprehensive self-management programme includes two or more of the following, education, breathlessness, physical activity, pulmonary rehabilitation, medication adherence, recording of symptoms and using medical devices to record physiological parameters. It is expected that smartphone apps may support a comprehensive self-management programme thereby improving clinical health outcomes resulting in reduced hospitalisations for patients with COPD. However, there is no conclusive scientific evidence available supporting the use of smartphone apps delivering a comprehensive self-management programme that improves clinical health outcomes for patients with COPD. Therefore, there is a strong need for more research surrounding smartphone apps supporting comprehensive self-management programme among COPD patients to better understand its role in healthcare. The COVID-19 pandemic has contributed to further accelerate the work on smartphones apps supporting a self-management programme to support vulnerable patients such as those with COPD in their home [23,24,25]. Given this, recent studies have been conducted within this domain, exploring smartphones apps supporting a comprehensive self-management programme for people with COPD.

This scoping review will build on existing reviews and will help to supplement and understand the existing literature on smartphone apps supporting a comprehensive self-management programme among COPD patients. The objective of this review will therefore answer the following research question: *What is the current literature pertaining to the use of a smartphone app in supporting a comprehensive self-management programme among COPD patients?*

## Review questions

1. *What is the current literature pertaining the use of a smartphone app in supporting a comprehensive self-management programme among COPD patients?*
2. *Have these apps been evaluated in terms of clinical health outcomes and if so, what are the outcomes of these evaluations?*

## Inclusion criteria

The inclusion criteria were designed according to the Johanna Briggs Institute (JBI) (2020) manual of scoping review methodology, comprising of Population, Concept, Context and Study Design [26], and are defined in [Table 1](#).

## Types of sources

To answer the research question, this scoping review will explore the literature using quantitative, qualitative and mixed methods design. Also, editorials and grey literature with relevant data will be included in this review.

## Methods

This scoping review is aligned with the JBI methodology framework for scoping reviews and the Preferred Reporting Items for Systematic Reviews and Meta-Analysis Scoping Review (PRISMA-ScR) extension checklist was used ([S1 Appendix](#)) [27]. This review was conducted

**Table 1. Inclusion Criteria.**

| Criteria                  | Description                                                                                                                                                                                                                                                                                                                                                                                                                                                                                                                                                                                                                                                                                                                                                                                                                                                                             |
|---------------------------|-----------------------------------------------------------------------------------------------------------------------------------------------------------------------------------------------------------------------------------------------------------------------------------------------------------------------------------------------------------------------------------------------------------------------------------------------------------------------------------------------------------------------------------------------------------------------------------------------------------------------------------------------------------------------------------------------------------------------------------------------------------------------------------------------------------------------------------------------------------------------------------------|
| <b>Population</b>         | The scoping review will include studies that recruited COPD patients irrespective of severity of disease, ethnic background, geographical area living at home using a smartphone app self-management programme.                                                                                                                                                                                                                                                                                                                                                                                                                                                                                                                                                                                                                                                                         |
| <b>Concept</b>            | To explore the literature on the use of a smartphone app supporting a comprehensive self-management programme and how these apps have been evaluated in terms of clinical health outcomes.<br>Smartphone apps will be defined as software that provides a particular function incorporated into smartphones to improve an health outcome, research, and health care services [22].<br>A comprehensive self-management programme will include two or more of the following: education, physical activity, breathlessness, recording of exacerbations, medication adherence, pulmonary rehabilitation, recording of symptoms or using medical devices to record physiological parameters.<br>This review will not include apps on technologies such as personal computers, iPad, Android tablets, Zoom, and Skype. Also, studies that included telemonitoring or clinic follow up visits. |
| <b>Context</b>            | The context will include hospital, primary care and community settings who care for COPD patients.<br>COPD patients living in long-term care facility will be excluded.                                                                                                                                                                                                                                                                                                                                                                                                                                                                                                                                                                                                                                                                                                                 |
| <b>Study Design</b>       | Study design such as editorials, quantitative research designs, qualitative research designs, mixed methods and grey literature with relevant data will be included.                                                                                                                                                                                                                                                                                                                                                                                                                                                                                                                                                                                                                                                                                                                    |
| <b>Language</b>           | No restrictions on languages.                                                                                                                                                                                                                                                                                                                                                                                                                                                                                                                                                                                                                                                                                                                                                                                                                                                           |
| <b>Year</b>               | No restrictions based on the year of publication.                                                                                                                                                                                                                                                                                                                                                                                                                                                                                                                                                                                                                                                                                                                                                                                                                                       |
| <b>Publication Status</b> | No restrictions will be employed based on publication status.                                                                                                                                                                                                                                                                                                                                                                                                                                                                                                                                                                                                                                                                                                                                                                                                                           |

Table 1 provides an outline of the inclusion criteria used for this scoping review in terms of population, concept, context, study design, language, year, and publication status.

<https://doi.org/10.1371/journal.pdig.0000532.t001>

in accordance with an *a priori* protocol published in Open Science Framework on the 31-05-2022.

## Search strategy

A preliminary search was conducted in, Medline, Embase and CINAHL databases to ascertain index terms and keywords. Following this a rigorous search will be carried out using the index terms and keywords on the following databases: Medline, Embase, CINAHL, Web of Science and ASSIA. These databases were chosen based on their relevance to the review questions. The search strategy was developed for each database, and with the aid of an experienced librarian a review of electronic search strategies was carried out (S2 Appendix). Hand searching of the literature occurred from the references of included articles. Grey literature was also be searched in appropriate organization sites (including on ProQuest Dissertations and Theses, RIAN, LENUS, Health Service Executive (HSE), Agency for Healthcare Research and Quality, Health Information and Quality Authority, Health Standards, and National Institute for Health and Care Excellence).

Studies that do not meet the inclusion criteria were excluded.

## Study selection

The results from the search were imported into Endnote v.X9 and duplicates were removed. Following this, citations were imported into Covidence, and the results of the search were reviewed. All studies were examined. Screening was completed at both the title/abstract level and full-text level. A third person would have been consulted if uncertainties remained between reviewers. A PRISMA flow diagram illustrates the results from the screening process

with explanations for full text exclusions. The flow chart clearly details the review decision process, indicate the results from the search, removal of duplicate citations, study selection, full retrieval, and additions from reference list searching and final summary presentation. Inter-rater agreement was calculated due to the iterative nature of the review.

### Data extraction

A data extraction form was used to streamline data collection and to ensure that all relevant data was gathered (S3 Appendix). Two independently reviewers piloted the extraction forms on a random sample of five articles. One reviewer charted the data, and the second reviewer verified the extracted data. A third person would be consulted to achieve consensus on coding, if consensus between the two independent reviewers can not be reached, and the data extraction form would be adjusted if required. Authors of papers were contacted to request missing or additional data for clarification, where required. A draft charting table were developed to record characteristics of the included studies and the key information relevant to the review objective (Table 2). Given the iterative nature of scoping reviews, additional information was collected as deemed appropriate.

## Results

### Study inclusion

During the initial phase, 1,697 studies were included, 52 were duplicates and 1,645 studies were screened. Following this, 1,389 studies did not meet the review inclusion criteria and were discarded. In the full text review 256 studies were reviewed and 15 studies met the inclusion criteria (Fig 1). The main reasons for exclusion were as follows, wrong intervention (tablet, iPad or personal computer), third party engagement (telemonitoring and follow up clinic visits), wrong study design and incorrect population.

### Characteristics of included studies

Study characteristics are reported in Table 2. All 15 studies were published after (2019) with the majority published in (2021). The studies were conducted in several countries including United States [28,29,30,31] Spain [32,33,34], Netherlands [35,36], United Kingdom [37,38], China [39], Germany [40], Switzerland [40], Korea [11], and Wales [41]. Eight studies [11,29,30,31,35,36,37,41] included a population less than 50 participants. The largest number of participants in a study included in this review was 184 participants [28]. Participants were generally aged greater than 60 years of age and the proportion of males were higher in comparison to females in some studies [11,32,33,36,37,38,39,41]. Study duration varied from 3 weeks to 12 months [36,39]. Three studies [30,31,33] used devices to measure physiological parameters such as a spirometer to measure lung function, pulse oximeter to measure oxygen saturations and a muscle strength training device to measure inspiratory and expiratory lung strength. Six studies included all severity groups of COPD [28,29,31,37,39,41]. The self-management app was provided by the researcher to the participants once they agreed to partake in the study.

### Primary outcome

Five studies primary outcome focused on engagement [30,31,35,38,41] while three of these studies also included acceptability [30,32] patient satisfaction [31], safety and efficacy [41]. All studies varied in study design with all studies including less than 50 participants. Two studies reported continued engagement throughout the designated timeframe, 6 [30] and 8 [31] weeks

Table 2. Study Characteristics.

| Author & Year                 | Country of Origin | Setting                | Severity of COPD Included (A, B,C,D) | Study Design                 | Sample Size | Average Age | Sex M % | Duration  | Primary Outcome                                  | Other Outcomes                                                                                                                                                                                                                    |
|-------------------------------|-------------------|------------------------|--------------------------------------|------------------------------|-------------|-------------|---------|-----------|--------------------------------------------------|-----------------------------------------------------------------------------------------------------------------------------------------------------------------------------------------------------------------------------------|
| Bowler <i>et al.</i> (2019)   | USA               | Community              | All                                  | Observational study          | 184         | 66          | 45%     | 3 weeks   | Exacerbations                                    | <ul style="list-style-type: none"> <li>Physical Activity</li> <li>Inhaler usage</li> <li>Respiratory symptoms</li> <li>PROactive Scale</li> </ul>                                                                                 |
| Alharbey <i>et al.</i> (2019) | USA               | Community              | All                                  | Mixed Method                 | 21          | 73.4        | 48%     | 1 month   | Knowledge and awareness regarding COPD           | <ul style="list-style-type: none"> <li>Self-efficacy</li> <li>Engagement</li> <li>Quality of life</li> <li>Recording oxygen saturations</li> <li>Education</li> <li>Perceived Seriousness</li> <li>Patient Empowerment</li> </ul> |
| North <i>et al.</i> (2020)    | United Kingdom    | Community and hospital | All                                  | Parallel arm feasibility RCT | 41          | 66.6        | 59%     | 90 days   | Recovery rate of symptoms                        | <ul style="list-style-type: none"> <li>Exacerbations</li> <li>Hospitalisations</li> <li>Quality of life</li> <li>Inhaler technique</li> <li>Engagement</li> <li>Anxiety &amp; Depression</li> </ul>                               |
| Park <i>et al.</i> (2020)     | Korea             | Community              | A, B & C                             | RCT                          | 42          | 67.88       | 78.6%   | 6 months  | Self-efficacy                                    | <ul style="list-style-type: none"> <li>Hospitalisations</li> <li>Engagement</li> <li>Education</li> <li>Physical Activity</li> <li>Quality of life</li> </ul>                                                                     |
| Hermosa <i>et al.</i> (2020)  | Spain             | Community              | B,C,D                                | Prospective cohort Study     | 116         | 66.51       | 78,4%   | 6 months  | Frequency and characteristics of an exacerbation | <ul style="list-style-type: none"> <li>Hospitalisations</li> <li>Engagement</li> <li>Self-efficacy</li> </ul>                                                                                                                     |
| Crooks <i>et al.</i> (2020)   | United Kingdom    | Community              | A&B                                  | RCT                          | 60          | 66          | 64.5%   | 3 months  | CAT at 90 days and inhaler errors                | <ul style="list-style-type: none"> <li>App usage</li> <li>Patient Activation</li> <li>Measurement</li> <li>Medication use.</li> <li>Quality of life</li> <li>Exacerbation</li> </ul>                                              |
| Wang <i>et al.</i> (2020)     | China             | Community              | All included                         | RCT                          | 68          | 63.9        | 81%     | 12 months | Health Related Quality of Life                   | <ul style="list-style-type: none"> <li>Self-management behaviour</li> <li>Self-efficacy</li> <li>Physical Activity</li> <li>Disease Education</li> </ul>                                                                          |
| Hermosa <i>et al.</i> (2021)  | Spain             | Community              | C & D                                | Prospective cohort           | 69          | 66.84       | 82.6%   | 6 months  | Exacerbations detected through the app           | <ul style="list-style-type: none"> <li>Lung function</li> <li>Breathlessness</li> <li>Recording of symptoms</li> <li>Medication use</li> <li>Disease education</li> <li>Engagement</li> </ul>                                     |

(Continued)

Table 2. (Continued)

| Author & Year                   | Country of Origin       | Setting   | Severity of COPD Included (A, B,C,D) | Study Design                                        | Sample Size | Average Age | Sex M % | Duration                                       | Primary Outcome                     | Other Outcomes                                                                                                                                                                                                                |
|---------------------------------|-------------------------|-----------|--------------------------------------|-----------------------------------------------------|-------------|-------------|---------|------------------------------------------------|-------------------------------------|-------------------------------------------------------------------------------------------------------------------------------------------------------------------------------------------------------------------------------|
| Miller <i>et al.</i> (2021)     | USA                     | Community | B & C                                | RCT                                                 | 30          | 58.4        | 36.6%   | 6 weeks                                        | Engagement & acceptability          | <ul style="list-style-type: none"> <li>• Physical Activity</li> <li>• Recording of symptoms</li> <li>• Breathlessness</li> <li>• Medication adherence</li> <li>• Respiratory muscle strength training</li> </ul>              |
| Knox <i>et al.</i> (2021)       | Wales                   | Community | All                                  | Quantitative, single-arm, clinical pilot study      | 25          | 64          | 76%     | 6 weeks                                        | Engagement, safety, and efficacy    | <ul style="list-style-type: none"> <li>• Knowledge &amp; confidence</li> <li>• Hospitalisations</li> <li>• Quality of life</li> <li>• Breathlessness</li> </ul>                                                               |
| Kooij <i>et al.</i> (2021)      | Netherlands             | Community | B,C,D                                | Mixed Methods                                       | 39          | 62.2        | 23%     | 8 weeks                                        | Engagement                          | <ul style="list-style-type: none"> <li>• Patient Satisfaction</li> <li>• Education</li> <li>• Medication Adherence</li> <li>• Expectations of the app</li> <li>• Hospitalisations</li> </ul>                                  |
| Battle <i>et al.</i> (2021)     | Spain                   | Community | C&D                                  | RCT                                                 | 87          | 82          | 50%     | 3months                                        | Use of health care service          | <ul style="list-style-type: none"> <li>• Engagement</li> <li>• Physical Activity</li> <li>• Quality of life</li> <li>• Patient empowerment</li> <li>• Cost effectiveness</li> <li>• Recording of oxygen saturation</li> </ul> |
| VanBuul <i>et al.</i> (2021)    | Netherlands             | Community | B,C,D                                | Retrospective study with a pre-post research design | 29          | 67.4        | 55.1%   | 12 months before 18 months after using the app | Hospitalisations                    | <ul style="list-style-type: none"> <li>• Detection of exacerbations</li> <li>• Symptom Recorder</li> <li>• Monitor steps</li> <li>• Disease education</li> </ul>                                                              |
| Spielmanns <i>et al.</i> (2022) | Germany and Switzerland | Community | B,C,D                                | RCT                                                 | 60          | 64.8        | 39%     | 6 months                                       | Physical Activity                   | <ul style="list-style-type: none"> <li>• Engagement</li> <li>• Quality of life</li> <li>• Anxiety &amp; Depression</li> <li>• Recording of symptoms</li> </ul>                                                                |
| Gelbman <i>et al.</i> (2022)    | USA                     | Community | All included                         | Prospective observational pilot study               | 19          | 79.6        | 47.4%   | 8 weeks                                        | Patient engagement and satisfaction | <ul style="list-style-type: none"> <li>• Lung function</li> <li>• Oxygen Saturation</li> <li>• Symptoms recorded</li> <li>• Medication use</li> <li>• Nebulizer use</li> <li>• Engagement</li> </ul>                          |

Study Characteristics provides an overview of the studies included in this review in terms of author, year, country of origin, setting, severity of COPD, study design, sample size, average age of participants, sex, duration of the study, primary outcomes and secondary outcomes.

<https://doi.org/10.1371/journal.pdig.0000532.t002>

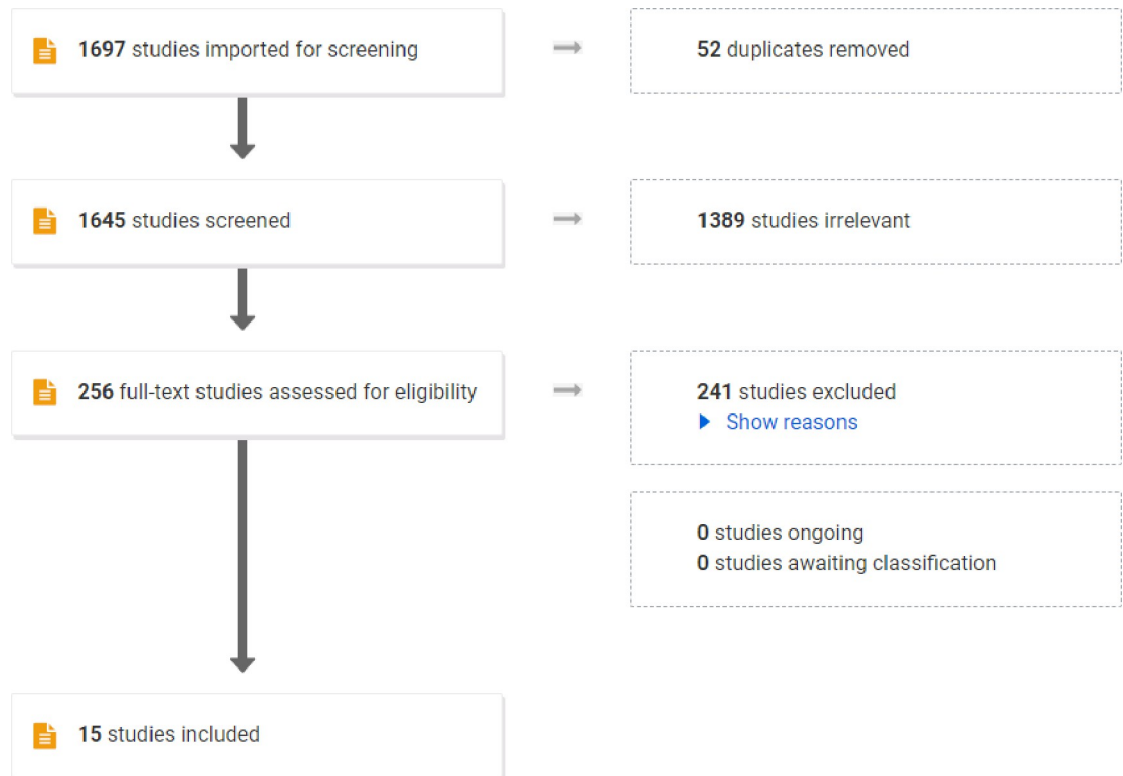

**Fig 1. PRISMA Flow Chart represents the screening process for this scoping review.** It highlights the number of studies assessed and the number of studies were excluded as they did not meet the eligibility criteria. Studies were excluded due to wrong intervention, third party engagement (telemonitoring and follow up clinic visits), wrong study design, wrong population, and non-English language studies. This PRISMA Flow Chart illustrates the number of studies included in this scoping review.

<https://doi.org/10.1371/journal.pdig.0000532.g001>

respectively. Knox *et al.* (2021) reported participants engaged with the app 31.8 days out of 42 days. Studies [33,35,37,38,40,41] reported high levels of engagement at the beginning of the study however engagement declined over time. COPD participants engaged with the app despite age, gender, or severity of disease [31]. Participants found the app relatively easy to use resulting in being positively satisfied and incurred no safety issues using the app, no adverse events occurred [30,31,35,40,41]. The app was accepted by the majority of participants who reported they would use the app for longer durations [30,32,35]. However, technological problems were noted in all studies and in some cases affected engagement levels [30,31].

The remaining eleven studies reported overall good compliance using the app resulting in empowering participants to engage with self-care activities to manage their chronic illness. One of the studies [30] gave a financial reward throughout the study resulting in continued engagement from participants.

Four studies [28,32,33,36] identified self-management apps to be useful in detecting exacerbations and two studies highlights that self-management apps may improve exacerbation recovery rates thereby lowering re-exacerbation or readmission rates over 6 months [37,36] demonstrating a cost effectiveness in using self-management apps. Cost effectiveness was explored [34] on the implementation of a self-management mobile app which proved effective in reducing hospitalisations by 50% for each patient resulting in cost savings of more than \$850 US dollars per patient. Furthermore, unplanned visits were reduced by 57% [34]. Also, the app proved useful in identifying the exact number of exacerbations in comparison to participants recall of their exacerbation history which may prove beneficial to clinicians during a



clinical visit [33]. Only one of these studies [28] included all categories relating to severity of disease. Study designs varied from pre-post design to observational with no parallel control group [28,32,33,36].

### Other outcomes

**Quality of life.** Seven studies [11,29,34,37,38,40,41] reported on health-related quality of life (HRQoL), two studies report a statistically significant difference in terms of HRQoL between the intervention and control group [11,40]. Sustained self-care behaviour was observed over 6 [11] to 12 [39] months, demonstrating the feasibility and efficacy of the self-management app. These studies were not fully powered which may question the significance of the statistical analysis. One study [41] did not have a control group as a comparator.

**Recording measurements.** Five studies [11,28,30,34,36] recorded physical activity using accelerometers. One study [39] used a questionnaire to evaluate physical activity among participants. Studies [11,34,39] reported a significant increase in physical activity in comparison to a control group. Two studies [28,36] did not use a control group. Miller *et al.* (2021) reported technological issues recording physical activity via an accelerometer on a smartwatch syncing with the mobile app.

One study [31] measured lung function using a spirometer and oxygen saturation via a pulse oximeter. Miller *et al.* (2021) measured inspiratory and expiratory lung muscle strength using a muscle strength training device.

**Disease education.** Six studies included disease education in the app [11,33,35,36,39,41]. Most participants reviewed the education section on the app resulting in improved self-management knowledge and behaviour [11,29,33,35,36,39]. This knowledge improved self-care of their chronic illness resulting in recognising exacerbations earlier resulting in participants self-managing the exacerbation or pursuing care earlier thereby avoiding hospitalisations [33,35,36,39]. One study [35] reported a statistically significant difference in knowledge and coping strategies for self-management care using the app.

### Discussion

COPD is an incurable chronic lung disease that results in frequent exacerbations resulting in hospitalisations thereby increasing mortality and morbidity among this cohort [1]. In recent times, due to the COVID-19 pandemic, studies have been conducted exploring smartphones apps supporting a comprehensive self-management programme for people with COPD. Interestingly, the COVID-19 pandemic has altered the way the older population view technology resulting in the increased use of smartphone apps in the delivery of healthcare [13,14]. With the increased use of smartphone apps within healthcare there is particular focus placed on data privacy. In (2018) Europe introduced the General Data Protection Regulation (GDPR) which was a significant piece of legislation to reinforce the principle of accountability and minimisation of personal data to be collected by healthcare organisations using smartphone apps [42]. However, with the increased use of smartphone apps and Artificial Intelligence (AI) there is a need to ensure stringent data sharing and privacy policies are in place to protect patients. Also, AI which may support smartphone app self-management programmes in terms of administrative tasks, tailoring individual self-management programme and updating apps with new educational content relating to COPD [43].

This scoping review illustrates that there are a lack of well-designed studies investigating smartphone apps in patients with COPD. This results in inconclusive evidence that smartphone apps supporting a comprehensive self-management programme has a statistically significant difference on clinical health outcomes in adults with COPD. This may be due to

components of the self-management app across all fifteen studies were heterogeneous in nature, in terms of intervention, study design, including all categories of COPD participants and small sample size. Self-management apps via a smartphone only appeals to a certain cohort of patients for many reasons such as digital literacy, not owning a smartphone, lack of internet connectivity, reduction in dexterity to use a smartphone or simply not interested in self-managing their COPD [11,28,29,30,31,32,33,34,35,36,37,38,39,40,41,44].

Across all studies participants engaged with the app however, app usage likely declines over time [11,28,29,30,31,32,33,34,35,36,37,38,39,40,41]. Third party involvement may improve app engagement over time [33,35,38,41]. While technical issues did not cause harm but rather proved as an inconvenience to participants it also resulted in reduced engagement [30,31]. Technical issues included loss of functionality of the app, unable to pair devices with Bluetooth on the smartphone, duplicate recordings, updating and advancing the app during the study. To achieve sustained engagement with the app it was noted the app must be personalised, easy to use, not over burdensome, have good technical support [30,31,44] and include follow up phone calls from a healthcare professional [11,30,34]. Also, financial incentives given at various points throughout the study contribute to sustained engagement with the app. The studies included in this review failed to demonstrate evidence of sustained engagement over a longer duration of twelve months.

It is evident exacerbations can negatively affect quality and quantity of life due to frequent hospitalisations thereby increasing mortality and morbidity [1,2]. A previous meta-analysis investigating a smartphone intervention compared to usual care demonstrated an 80% reduction in the probability of having an exacerbation [20]. It is important to note that outcome measures such as exacerbation rates may be unreliable as, only six studies reported on exacerbations [28,30,32,33,34,36]. Also, study designs differed, and exacerbations were reported using a range of varied tools. However, four studies illustrated the smartphone self-management apps empowered a cohort of COPD participants to engage in managing their chronic illness which proved useful in detecting exacerbations earlier resulting in reducing the need for hospitalisations over a three-to-six-month period [34,36,37,39]. By reducing hospitalisations incurred a cost savings for health care and an improved quality and quantity of life for these patients [34]. No studies in this review reported a reduction in hospitalisations or a reduced re-exacerbation rate over a twelve-month period.

Participant satisfaction and expectation was high while using the app [30,31,34,35,36,40,41]. No studies reported any participant safety issues while using the app. Clinical health outcomes such as physical activity, quality of life, self-efficacy, smoking cessation [39], medication adherence improved while using the smartphone self-management app. However, only two studies [11,40] reported a statistically significant difference in terms of HRQoL between the intervention and control group over a six-month period. This may be related to the small sample sizes which 13 [11,29,30,31,33,35,34,36,37,38,39,40,41] out of the 15 studies had less than 100 participants. Using the app illustrated a positive effect on knowledge around self-care for a chronic illness such as COPD resulting in improved clinical health outcomes for participants with COPD [11,28,32,33,34,35,36,39]. The provision of disease education using a smartphone app was shown to positively influence self-management decisions among the COPD population. As most patients diagnosed with COPD are greater than 60 years of age involving friends and or family members in the self-management process can be helpful in improving self-efficacy and quality of life among this cohort [41].

This scoping review provides an overview of the current literature and has summarized the findings on the use of a smartphone app supporting a self-management programme for COPD patients. Also, this review has adhered to a standard, rigorous methodological and reporting

framework such as the JBI (2020) PRISMA-ScR. Limitations of this review include the absence of a risk of bias evaluations on the studies included in this review.

## Conclusion

There is insufficient evidence to support a statistically significant difference pertaining to a comprehensive self-management programme via a smartphone app on clinical health outcomes in adults with COPD. However, it is evident from the literature that smartphone self-management apps may positively influence participants self-management decisions in terms of knowledge, increase physical activity, self-efficacy that may result in reduced hospitalisation and improved quality of life. Although, technical issues and app usage over time remains a challenge. There is a need for improved digital advances in apps for COPD patients and for these apps to be successful there is a need for investment in technical advances and support to be readily available for participants to support engagement levels. Given technology is advancing rapidly, it is envisioned that smartphone apps will become a natural complement within clinical practice. Therefore, there is a need for more research exploring smartphone apps delivering a comprehensive self-management programme among all categories of the COPD population over a longitudinal period of twelve months.

## Supporting information

### S1 Appendix. PRISMA-ScR Checklist.

(PDF)

### S2 Appendix. Search Strategy.

(PDF)

### S3 Appendix. Data Extraction Form.

(PDF)

## Author Contributions

**Conceptualization:** Lisa Glynn.

**Data curation:** Lisa Glynn.

**Formal analysis:** Lisa Glynn, Margaret Mc Cann, Catherine Mc Cabe.

**Investigation:** Lisa Glynn, Margaret Mc Cann, Catherine Mc Cabe.

**Methodology:** Lisa Glynn, Margaret Mc Cann, Catherine Mc Cabe.

**Project administration:** Lisa Glynn.

**Validation:** Lisa Glynn, Margaret Mc Cann, Catherine Mc Cabe.

**Writing – original draft:** Lisa Glynn, Margaret Mc Cann, Catherine Mc Cabe.

**Writing – review & editing:** Lisa Glynn, Margaret Mc Cann, Catherine Mc Cabe.

## References

1. Augsti A, Beasley R, Celli RB, Criner G, Halpin D, Varela LV, et al. Global initiative for chronic obstructive lung disease—global initiative for chronic obstructive lung disease. GOLD. 2023. Available from: <http://www.goldcopd.org/>
2. WHO [Internet]. The top 10 causes of death World Health Organization. World Health Organization; [cited 2023Mar13]. Available from: <https://www.who.int/news-room/fact-sheets/detail/the-top-10-causes-of-death>

3. Connor OM, Hurley E, McCormack S, Connor OT. Respiratory health of the nation. Irish Thoracic Society. 2018 [cited 2022June13]. Available from: <https://irishthoracicsociety.com/respiratory-health-of-the-nation-2018/>
4. WHO [Internet]. Chronic obstructive pulmonary disease (COPD) World Health Organization. World Health Organization; [cited 2022June13]. Available from: [https://www.who.int/news-room/fact-sheets/detail/chronic-obstructive-pulmonary-disease-\(copd\)](https://www.who.int/news-room/fact-sheets/detail/chronic-obstructive-pulmonary-disease-(copd))
5. Gaveikaite V, Grundstrom C, Winter S, Chouvarda I, Maglaveras N, Priori R. A systematic map and in-depth review of European telehealth interventions efficacy for chronic obstructive pulmonary disease. *Respiratory Medicine*. 2019; 158:78–88. <https://doi.org/10.1016/j.rmed.2019.09.005> PMID: 31614305
6. Licskai CJ, Sands TW, Ferrone M. Development and pilot testing of a mobile health solution for asthma self-management: Asthma action plan smartphone application pilot study. *Canadian Respiratory Journal*. 2013; 20(4): 301–6. <https://doi.org/10.1155/2013/906710> PMID: 23936890
7. McCabe C, McCann M, Brady AM. Computer and mobile technology interventions for self-management in chronic obstructive pulmonary disease. *Cochrane Database of Systematic Reviews*. 2017; 2020(2). <https://doi.org/10.1002/14651858.CD011425.pub2> PMID: 28535331
8. Newham J, Presseau J, Heslop-Marshall K, Russell S, Ogunbayo O, Netts P, et al. Features of self-management interventions for people with COPD associated with improved health-related quality of life and reduced emergency department visits: A systematic review and meta-analysis. *International Journal of Chronic Obstructive Pulmonary Disease*. 2017; 12:1705–20. <https://doi.org/10.2147/COPD.S133317> PMID: 28652723
9. MacNab M, Lee SH, McCloughan L, Hanley J, McKinsty B, Pinnock H. Oximetry-supported self-management for chronic obstructive pulmonary disease: Mixed Method Feasibility Pilot Project. *BMC Health Services Research*. 2015; 15(1). <https://doi.org/10.1186/s12913-015-1135-2> PMID: 26503028
10. Cannon D, Buys N, Sriram KB, Sharma S, Morris N, Sun J. The effects of chronic obstructive pulmonary disease self-management interventions on improvement of quality of life in COPD patients: A meta-analysis. *Respiratory Medicine*. 2016; 121:81–90. <https://doi.org/10.1016/j.rmed.2016.11.005> PMID: 27888996
11. Park SK, Bang CH, Lee SH. Evaluating the effect of a smartphone app-based self-management program for people with COPD: A randomized controlled trial. *Applied Nursing Research*. 2020; 52: 151231. <https://doi.org/10.1016/j.apnr.2020.151231> PMID: 31955942
12. Pedone C, Lelli D. Systematic review of telemonitoring in COPD: An update. *Advances in Respiratory Medicine*. 2015; 83(6): 476–84. <https://doi.org/10.5603/PiAP.2015.0077> PMID: 26559801
13. Lundell S, Holmner Å, Rehn B, Nyberg A, Wadell K. Telehealthcare in COPD: A systematic review and meta-analysis on physical outcomes and dyspnea. *Respiratory Medicine*. 2015; 109(1): 11–26. <https://doi.org/10.1016/j.rmed.2014.10.008> PMID: 25464906
14. Yang F, Xiong Z-F, Yang C, Li L, Qiao G, Wang Y, et al. Continuity of care to prevent readmissions for patients with chronic obstructive pulmonary disease: A systematic review and meta-analysis. *COPD: Journal of Chronic Obstructive Pulmonary Disease*. 2017; 14(2): 251–61.
15. AARP Research [Internet]. AARP Research Insights on Technology. AARP. [cited 2023Mar13]. Available from: <https://www.aarp.org/pri/topics/technology/internet-media-devices/aarp-research-insights-technology/>
16. Colombo F, Hashiguchi OCT, Lindner L, Lorenzoni L. The future of telemedicine after COVID-19 – OECD. OECD. 2023 [cited 2024 February 12]. Available from: <https://www.oecd.org/coronavirus/policy-responses/the-future-of-telemedicine-after-covid-19-d46e9a02/>.
17. Inglis SC, Clark RA, McAlister FA, Ball J, Lewinter C, Cullington D, et al. Structured telephone support or telemonitoring programmes for patients with chronic heart failure. *Cochrane Database of Systematic Reviews*. 2010. (8) <https://doi.org/10.1002/14651858.CD007228.pub2> PMID: 20687083
18. Gunawardena KC, Jackson R, Robinett I, Dhaniska L, Jayamanne S, Kalpani S, et al. The influence of the smart glucose manager mobile application on diabetes management. *Journal of Diabetes Science and Technology*. 2018; 13(1): 75–81. <https://doi.org/10.1177/1932296818804522> PMID: 30264583
19. Alwashmi M, Hawboldt J, Davis E, Marra C, Gamble J-M, Abu Ashour W. The effect of smartphone interventions on patients with chronic obstructive pulmonary disease exacerbations: A systematic review and meta-analysis. *JMIR mHealth and uHealth*. 2016; 4(3). <https://doi.org/10.2196/mhealth.5921> PMID: 27589898
20. Demeyer H, Louvaris Z, Frei A, Rabinovich RA, de Jong C, Gimeno-Santos E, et al. Physical activity is increased by a 12-week semiautomated telecoaching programme in patients with COPD: A multicentre randomised controlled trial. *Thorax*. 2017; 72(5): 415–23. <https://doi.org/10.1136/thoraxjnl-2016-209026> PMID: 28137918
21. Rassouli F, Boutellier D, Duss J, Huber S, Brutsche MH. Digitalizing multidisciplinary pulmonary rehabilitation in COPD with a smartphone application: An international observational pilot study. *International*

- Journal of Chronic Obstructive Pulmonary Disease. 2018; (13): 3831–6. <https://doi.org/10.2147/COPD.S182880> PMID: 30538444
22. Shaw G, Whelan ME, Armitage LC, Roberts N, Farmer AJ. ARE COPD self-management mobile applications effective? A systematic review and meta-analysis. *npj Primary Care Respiratory Medicine*. 2020; 30(1). <https://doi.org/10.1038/s41533-020-0167-1> PMID: 32238810
  23. Cucciniello M, Petracca F, Ciani O, Tarricone R. Development features and study characteristics of mobile health apps in the management of chronic conditions: A systematic review of Randomised Trials. *npj Digital Medicine*. 2021; 4(1). <https://doi.org/10.1038/s41746-021-00517-1> PMID: 34611287
  24. Fagherazzi G, Goetzinger C, Rashid MA, Aguayo GA, Huiart L. Digital Health Strategies to fight COVID-19 worldwide: Challenges, recommendations, and a call for papers. *Journal of Medical Internet Research*. 2020; 22(6).
  25. Petracca F, Ciani O, Cucciniello M, Tarricone R. Harnessing Digital Health Technologies during and after the COVID-19 pandemic: Context matters. *Journal of Medical Internet Research*. 2020;22(12).
  26. Peters MDJ, Marine C, Tricco AC, Pollock D, Munn Z, Alexander L, McInerney P, Godfrey CM, and Khalil H. Updated methodological guidance for the conduct of scoping reviews. *JB I evidence synthesis*. 2020; 18(10): 2119–2126. Available from: <https://doi.org/10.11124/BJIES-20-00167> PMID: 33038124
  27. Tricco AC, Lillie E, Zarin W, O'Brien KK, Colquhoun H, Levac D, et al. PRISMA Extension for Scoping Reviews (PRISMA ScR): Checklist and Explanation. *Ann Intern Med*. (2018); 169: 467–473. <https://doi.org/10.7326/M18-0850> PMID: 30178033
  28. Bowler R, Allinder M, Jacobson S, Miller A, Miller B, Tal-Singer R, et al. Real-world use of rescue inhaler sensors, electronic symptom questionnaires and physical activity monitors in COPD. *BMJ Open Respiratory Research*. 2019; 6(1). <https://doi.org/10.1136/bmjresp-2018-000350> PMID: 30956796
  29. Alharbey R, Chatterjee S. An mHealth assistive system “MyLung” to empower patients with chronic obstructive pulmonary disease: Design Science Research. *JMIR Formative Research*. 2019; 3(1). <https://doi.org/10.2196/12489> PMID: 30888329
  30. Miller S, Teufel R, Nichols M, Davenport P, Mueller M, Silverman E, et al. Feasibility of RESP-fit: Technology-enhanced self-management intervention for adults with COPD. *International Journal of Chronic Obstructive Pulmonary Disease*. 2021; (16): 3263–73. <https://doi.org/10.2147/COPD.S326675> PMID: 34887656
  31. Gelbman BD, Reed CR. An integrated, multimodal, Digital Health Solution for chronic obstructive pulmonary disease: Prospective observational pilot study. *JMIR Formative Research*. 2022; 6(3). <https://doi.org/10.2196/34758> PMID: 35142291
  32. Rodríguez Hermosa JL, Fuster Gomila A, Puente Maestu L, Amado Diago CA, Callejas González FJ, Malo De Molina Ruiz R, et al. Compliance and utility of a smartphone app for the detection of exacerbations in patients with chronic obstructive pulmonary disease: Cohort study. *JMIR mHealth and uHealth*. 2020; 8(3). <https://doi.org/10.2196/15699> PMID: 32191213
  33. Rodríguez Hermosa JL, Fuster Gomila A, Puente Maestu L, Amado Diago CA, Callejas-González FJ, Malo De Molina Ruiz R, et al. Assessing the usefulness of the Prevexair smartphone application in the follow-up high-risk patients with COPD. *International Journal of Chronic Obstructive Pulmonary Disease*. 2021;(16): 53–65. <https://doi.org/10.2147/COPD.S279394> PMID: 33447026
  34. de Batlle J, Massip M, Vargiu E, Nadal N, Fuentes A, Ortega Bravo M, et al. Implementing Mobile Health-enabled integrated care for complex chronic patients: Intervention effectiveness and cost-effectiveness study. *JMIR mHealth and uHealth*. 2021; 9(1). <https://doi.org/10.2196/22135> PMID: 33443486
  35. Kooij L, Vos PJ, Dijkstra A, van Harten WH. Effectiveness of a mobile health and self-management app for high-risk patients with chronic obstructive pulmonary disease in daily clinical practice: Mixed methods evaluation study. *JMIR mHealth and uHealth*. 2021; 9(2). <https://doi.org/10.2196/21977> PMID: 33538699
  36. van Buul AR, Derksen C, Hoedemaker O, van Dijk O, Chavannes NH, Kasteleyn MJ. EHealth program to reduce hospitalizations due to acute exacerbation of chronic obstructive pulmonary disease: Retrospective study. *JMIR Formative Research*. 2021; 5(3). <https://doi.org/10.2196/24726> PMID: 33734091
  37. North M, Bourne S, Green B, Chauhan AJ, Brown T, Winter J, et al. A randomised controlled feasibility trial of E-health application supported care vs usual care after exacerbation of COPD: The rescue trial. *npj Digital Medicine*. 2020; 3(1).
  38. Crooks MG, Elkes J, Storrar W, Roy K, North M, Blythin A, et al. Evidence generation for the clinical impact of mycopd in patients with mild, moderate and newly diagnosed COPD: A randomised controlled trial. *ERJ Open Research*. 2020; 6(4): 00460–2020. <https://doi.org/10.1183/23120541.00460-2020> PMID: 33263052
  39. Wang LH, Guo YM, Wang M, Zhao Y. A mobile health application to support self-management in patients with chronic obstructive pulmonary disease: A randomised controlled trial. *Clinical Rehabilitation*. 2020; 35(1): 90–101. <https://doi.org/10.1177/0269215520946931> PMID: 32907384

40. Spielmanns M, Gloeckl R, Jarosch I, Leitl D, Schneeberger T, Boeselt T, et al. Using a smartphone application maintains physical activity following pulmonary rehabilitation in patients with COPD: A randomised controlled trial. *Thorax*. 2023; 78(5): 442–450. <https://doi.org/10.1136/thoraxjnl-2021-218338> Epub 2022 Apr 21. PMID: [35450945](https://pubmed.ncbi.nlm.nih.gov/35450945/); PMCID: PMC10176348.
41. Knox L, Gemine R, Rees S, Bowen S, Groom P, Taylor D, et al. Assessing the uptake, engagement, and safety of a self-management app, copd.pal, for chronic obstructive pulmonary disease: A pilot study. *Health and Technology*. 2021; 11(3): 557–62.
42. Benjumea J, Ropero J, Rivera-Romero O, Dorrnzoro-Zubiete E, Carrasco A. Privacy Assessment in Mobile Health Apps: Scoping Review. *JMIR Mhealth Uhealth*. 2020; 28(7):e18868. <https://doi.org/10.2196/18868> PMID: [32459640](https://pubmed.ncbi.nlm.nih.gov/32459640/); PMCID: PMC7367524.
43. Bohr A, Memarzadeh K. The rise of artificial intelligence in healthcare applications. *Artificial Intelligence in Healthcare*. 2020;25–60. <https://doi.org/10.1016/B978-0-12-818438-7.00002-2> Epub 2020. PMCID: PMC7325854.
44. Slevin P, Kessie T, Cullen J, Butler MW, Donnelly SC, Caulfield B. A qualitative study of chronic obstructive pulmonary disease patient perceptions of the barriers and facilitators to adopting Digital Health Technology. *DIGITAL HEALTH*. 2019; 5:205520761987172. <https://doi.org/10.1177/2055207619871729> PMID: [31489206](https://pubmed.ncbi.nlm.nih.gov/31489206/); PMCID: PMC6710666.
